# Supplementary material
Source: publisher site journal article supplement (https://www.dovepress.com/article/317885)
Supplement: Supplementary file 1 [file get_supplementary_file.php]

Supplementary material

**Table S1 Demographic characteristic of patient population with high-intermediate FLIPI score.**

| **Description** | **Value** | **Reference** |
| --- | --- | --- |
| Average age of cohorts (years) | 57.90 | GALLIUM studyS1 |
| Body weight (kg) | 75.70 | GALLIUM studyS1 |
| Height (cm) | 168.30 | GALLIUM studyS1 |
| Body Surface Area (m²) | 1.86 | Estimated by Dubois formulaS2 |

**Table S2 Monthly adverse event frequency from GALLIUM Clinical TrialS1**

| **Adverse Event** | **O-benda** | **O-CHOP** | **O-CVP** | **R-benda** | **R-CHOP** | **R-CVP** |
| --- | --- | --- | --- | --- | --- | --- |
| Anemia | 0.039% | 0.204% | 0.036% | 0.035% | 0.099% | 0.000% |
| Dyspnea | 0.039% | 0.068% | 0.036% | 0.021% | 0.022% | 0.143% |
| Febrile neutropenia | 0.124% | 0.340% | 0.107% | 0.111% | 0.209% | 0.095% |
| Leukopenia | 0.072% | 0.852% | 0.036% | 0.111% | 1.072% | 0.047% |
| Neutropenia | 1.350% | 3.840% | 1.546% | 1.157% | 3.661% | 1.098% |
| Pneumonia | 0.065% | 0.045% | 0.000% | 0.021% | 0.055% | 0.047% |
| Thrombocytopenia | 0.229% | 0.238% | 0.036% | 0.083% | 0.066% | 0.000% |

O, obinutuzumab; R, rituximab; benda, bendamustine; CHOP, cyclophosphamide, doxorubicin, vincristine, and oral prednisone; CVP, cyclophosphamide, vincristine and prednisone

**Table S3 PSA parameter details that are varying simultaneously**

| **Model Variable** | **Distribution used** | **Reference** |
| --- | --- | --- |
| Utility values | Beta distribution | According to Briggs A, et al. 2008S3 |
| Parameter estimates for the parametric PFS and PPS function | Multivariate normal distribution | According to Briggs A, et al. 2008S3 |
| Number of adverse events | Log-normal distribution | According to Briggs A, et al. 2008S3 |
| Costs of adverse events | Log-normal distribution | According to Briggs A, et al. 2008S3 |
| Monthly supportive care costs for the PFS and Progressed health states | Log-normal distribution | According to Briggs A, et al. 2008S3 |
| PFS extrapolation | Normal distribution with co-variance matrix | According to Briggs A, et al. 2008S3 |
| PPS extrapolation | Normal distribution with co-variance matrix | According to Briggs A, et al. 2008S3 |
| Administration costs | Log-normal distribution | According to Briggs A, et al. 2008S3 |

No distribution was applied to the cost of study drugs, given that these are certain parameters.

## Supplementary reference

S1. Marcus R, Davies A, Ando K, et al. Obinutuzumab for the First-Line Treatment of Follicular Lymphoma. N Engl J Med. 2017;377(14):1331-1344. doi:10.1056/NEJMoa1614598

S2. Du Bois D, Du Bois EF. A formula to estimate the approximate surface area if height and weight be known. 1916. *Nutrition*. 1989;5(5):303-313

S3. Briggs A, Sculpher M, and Claxton K. *Decision Modelling for Health Economic Evaluation.* Oxford: Oxford University Press; 2008
